# Supplementary material for: Improving the luminescence property of the novel yellow-emitting phosphor SrLa2Sc2O7:Bi3+ with charge compensators (Li+, Na+, K+) and its application in NUV-based white LEDs
Source: Royal Society of Chemistry journal article supplement (doi:10.1039/d2dt03217a), 2022-01-01
Supplement: d2dt03217a1.pdf [file d2dt03217a1.pdf]

### Supporting

1. UV-WLED parameters: using model SMD 2835 370nm LED chip, power 0.2W, forward voltage 2.8-3.8V, current 60mA, luminous area 9.8mm<sup>2</sup>, luminous angle 120°. The spectral pattern of electroluminescence with currents from 60 mA.

2. Discussing the EL results with current literature

| sample                                                                                                                                   | CIE             | CCT   | R <sub>a</sub> |              |
|------------------------------------------------------------------------------------------------------------------------------------------|-----------------|-------|----------------|--------------|
| GaN chip+ Rb <sub>3</sub> Na(Li <sub>3</sub> SiO <sub>4</sub> ) <sub>4</sub> :8%Eu <sup>2+</sup>                                         | (0.283,0.313)   | 8743K | -              | <sup>1</sup> |
| 415nmLED+BaScO <sub>2</sub> F:Bi <sup>3+</sup> ,K <sup>+</sup> +Sr <sub>3</sub> SiO <sub>5</sub> :Eu <sup>2+</sup>                       | (0.3480,0.3343) | 4811K | 85             | <sup>2</sup> |
| UV chip(395nm)+BaMgAl <sub>10</sub> O <sub>17</sub> :Eu <sup>2+</sup> +Cs <sub>2</sub> Hf <sub>1-x</sub> Te <sub>x</sub> Cl <sub>6</sub> | (0.3272,0.3367) | 5741K | 81.9           | <sup>3</sup> |
| UV chip+ Cs <sub>4</sub> MnBi <sub>2</sub> Cl <sub>12</sub> + BaMgAl <sub>10</sub> O <sub>17</sub> :Eu <sup>2+</sup>                     | (0.35,0.36)     | 4510K | 82             | <sup>4</sup> |
| Lu <sub>3</sub> Al <sub>5</sub> O <sub>12</sub> :Ce <sup>3+</sup>                                                                        |                 |       |                |              |
| UV chip(370nm)+ Sr <sub>5</sub> (PO <sub>4</sub> ) <sub>3</sub> Cl:Eu <sup>2+</sup>                                                      | (0.32,0.27)     | 6250K | 82             | This work    |
| SrLa <sub>2</sub> Sc <sub>2</sub> O <sub>7</sub> :Bi <sup>3+</sup>                                                                       |                 |       |                |              |
| UV chip(370nm)+ Sr <sub>5</sub> (PO <sub>4</sub> ) <sub>3</sub> Cl:Eu <sup>2+</sup>                                                      | (0.34,0.30)     | 4879K | 91.3           | This work    |
| SrLa <sub>2</sub> Sc <sub>2</sub> O <sub>7</sub> : Bi <sup>3+</sup> ,Li <sup>+</sup>                                                     |                 |       |                |              |

1. Liao, M.; Wang, Q.; Lin, Q.; Xiong, M.; Zhang, X.; Dong, H.; Lin, Z.; Wen, M.; Zhu, D.; Mu, Z.; Wu, F., Na Replaces Rb towards High-Performance Narrow-Band Green Phosphors for Backlight Display Applications. *Adv. Opt. Mater.* **2021**, 9 (17), 2100465.

2. Cai, M.; Lang, T.; Han, T.; Valiev, D.; Fang, S.; Guo, C.; He, S.; Peng, L.; Cao, S.; Liu, B.; Du, L.; Zhong, Y.; Polisadova, E., Novel Cyan-Green-Emitting Bi<sup>3+</sup>-Doped BaScO<sub>2</sub>F, R<sup>+</sup> (R = Na, K, Rb) Perovskite Used for Achieving Full-Visible-Spectrum LED Lighting. *Inorg. Chem.* **2021**, 60 (20), 15519-15528.

3. Liu, R.; Yang, J.; Zhao, D.; Liu, W.; Li, G.; Yan, W.; Zhang, W., Efficient Broadband Yellow-Green Emission of Vacancy Halide Double Perovskites Through the Ion-Exchanged Strategy. *Inorg. Chem.* **2021**, 60 (23), 17878-17888.

4. He, S.; Fang, S.; Han, T.; Lang, T.; Cai, M.; You, H.; Peng, L.; Cao, S.; Liu, B.; Qiang, Q.; Chen, J.; Lei, B., Spectral Red Shift of Cs<sub>4</sub>Mn(Bi<sub>1-x</sub>In<sub>x</sub>)<sub>2</sub>Cl<sub>12</sub> Layered Double Perovskite by Adjusting the Microstructure of the [MnCl<sub>6</sub>]<sup>4-</sup> Octahedron. *J. Phys. Chem. C* **2021**, 125 (31), 16938-16945.
